# Supplementary material
Source: ML conference proceedings conference paper supplement (https://proceedings.neurips.cc/paper_files/paper/2019/hash/635440afdfc39fe37995fed127d7df4f-Abstract.html)
Supplement: Supplementary file [file 635440afdfc39fe37995fed127d7df4f-Supplemental.zip]

## A Proofs

**Lemma 11** ([24]). *If the input graph is degree-bounded and input size is bounded by a constant, each node needs to transmit and process only a constant number of bits.*

*Proof of Theorem 1.* We prove the case of  $\mathcal{L} = \text{VV}_C$ . The proof for other cases can be done similarly. Let  $\mathcal{P}_{\text{GNNs}}$  be the set of graph problems that at least one  $\text{VV}_C$ -GNN can solve and  $\mathcal{P}_{\text{algo}}$  be the set of graph problems that at least one distributed local algorithm on the  $\text{VV}_C(1)$  model can solve. Theorem 1 says that  $\mathcal{P}_{\text{GNNs}} = \mathcal{P}_{\text{algo}}$ . We now prove the following two lemmas.

**Lemma 12.** *For any  $\text{VV}_C$ -GNN, there exists a distributed local algorithm on the  $\text{VV}_C(1)$  model that solves the same set of graph problems as the  $\text{VV}_C$ -GNN.*

**Lemma 13.** *For any distributed local algorithm on the  $\text{VV}_C(1)$  model, there exists a  $\text{VV}_C$ -GNN that solves the same set of graph problems as the distributed local algorithm.*

If these lemmas hold, for any  $P \in \mathcal{P}_{\text{GNNs}}$ , there exists a  $\text{VV}_C$ -GNN that solves  $P$ . From Lemma 12, there exists a distributed local algorithm on the  $\text{VV}_C(1)$  model that solves  $P$ . Therefore,  $P \in \mathcal{P}_{\text{algo}}$  and  $\mathcal{P}_{\text{GNNs}} \subseteq \mathcal{P}_{\text{algo}}$ . Conversely,  $\mathcal{P}_{\text{algo}} \subseteq \mathcal{P}_{\text{GNNs}}$  holds by the same argument. Therefore,  $\mathcal{P}_{\text{algo}} = \mathcal{P}_{\text{GNNs}}$ .

*Proof of Lemma 12:* Let  $N$  be an arbitrary  $\text{VV}_C$ -GNN and  $L$  be the number of layers of  $N$ . The inference of  $N$  itself is a distributed local algorithm on the  $\text{VV}_C(1)$  model that communicates with neighboring nodes in  $L$  rounds. Namely, the message from the node  $v$  to its  $i$ -th port in the  $l$ -th communication round is a pair  $(z_v^{(l)}, i)$ , and each node calculates the next message based on the received messages and the function  $f$ . Finally, each node calculates the output from the obtained embedding without communication.

*Proof of Lemma 13:* Let  $A$  be an arbitrary distributed local algorithm and  $L$  be the number of communication rounds of  $A$ . Let  $F$  be a set of possible input features. From Assumption 3, the cardinality of  $F$  is finite. Let  $m_{vi}^{(l)} \in \mathbb{R}^{d_l}$  be the message that node  $v$  receives from  $i$ -th port in the  $l$ -th communication round and  $s_v^{(l)} \in \mathbb{R}^{d_l}$  be the internal state of node  $v$  in the  $l$ -th communication round.  $s_v^{(1)}$  is the input to node  $v$  (e.g., the degree of  $v$ ). Note that we can assume the dimensions of  $m_{vi}^{(l)}$  and  $s_v^{(l)}$  to be the constant  $d_l$  without loss of generality by Lemma 11. Let  $g_j^{(0)}(s_v^{(1)}): F \rightarrow \mathbb{R}^{d_1}$  be the function that calculates the message to the  $j$ -th port in the first communication round from the degree information. Let  $g_j^{(l)}(m_1^{(l)}, m_2^{(l)}, \dots, m_\Delta^{(l)}, s^{(l)}): \mathbb{R}^{d_l(\Delta+1)} \rightarrow \mathbb{R}^{d_{l+1}}$  be the function that calculates the message to the  $j$ -th port in the  $(l+1)$ -th communication round from the received messages and the internal state in the  $l$ -th communication round ( $1 \leq l \leq L-1$ ). Let  $g^{(l)}(m_1^{(l)}, m_2^{(l)}, \dots, m_\Delta^{(l)}, s^{(l)}): \mathbb{R}^{d_l(\Delta+1)} \rightarrow \mathbb{R}^{d_{l+1}}$  be the function that calculates the internal state in the  $(l+1)$ -th communication round from the received messages and the internal state in the  $l$ -th communication round ( $1 \leq l \leq L-1$ ). Let  $g^{(L)}(m_1^{(L)}, m_2^{(L)}, \dots, m_\Delta^{(L)}, s^{(L)}): \mathbb{R}^{d_L(\Delta+1)} \rightarrow Y$  be the function that determines the output from the received messages and the internal state in the  $L$ -th communication round. Then, we construct a  $\text{VV}_C$ -GNN that solves the same set of graph problems as  $A$ . Namely, let  $f^{(1)}: \mathbb{R}^{d_1+(d_1+1)\Delta} \rightarrow \mathbb{R}^{d_2(\Delta+1)}$  be

$$\begin{aligned} f^{(1)}(z_v^{(1)}, z_{p_{\text{tail}}(v,1)}^{(1)}, p_n(v,1), z_{p_{\text{tail}}(v,2)}^{(1)}, p_n(v,2), \dots, z_{p_{\text{tail}}(v,\Delta)}^{(1)}, p_n(v,\Delta)) = \\ \text{CONCAT}(g_1^{(0)}(g_{p_n(v,1)}^{(0)}(z_{p_{\text{tail}}(v,1)}^{(1)}), g_{p_n(v,2)}^{(0)}(z_{p_{\text{tail}}(v,2)}^{(1)}), \dots, g_{p_n(v,\Delta)}^{(0)}(z_{p_{\text{tail}}(v,\Delta)}^{(1)}), z_v^{(1)}), \\ g_2^{(1)}(g_{p_n(v,1)}^{(0)}(z_{p_{\text{tail}}(v,1)}^{(1)}), g_{p_n(v,2)}^{(0)}(z_{p_{\text{tail}}(v,2)}^{(1)}), \dots, g_{p_n(v,\Delta)}^{(0)}(z_{p_{\text{tail}}(v,\Delta)}^{(1)}), z_v^{(1)}), \\ \dots, \\ g_\Delta^{(1)}(g_{p_n(v,1)}^{(0)}(z_{p_{\text{tail}}(v,1)}^{(1)}), g_{p_n(v,2)}^{(0)}(z_{p_{\text{tail}}(v,2)}^{(1)}), \dots, g_{p_n(v,\Delta)}^{(0)}(z_{p_{\text{tail}}(v,\Delta)}^{(1)}), z_v^{(1)}), \\ g^{(1)}(g_{p_n(v,1)}^{(0)}(z_{p_{\text{tail}}(v,1)}^{(1)}), g_{p_n(v,2)}^{(0)}(z_{p_{\text{tail}}(v,2)}^{(1)}), \dots, g_{p_n(v,\Delta)}^{(0)}(z_{p_{\text{tail}}(v,\Delta)}^{(1)}), z_v^{(1)})) \end{aligned}$$

and let  $f^{(l)}: \mathbb{R}^{d_l(\Delta+1)+(d_l(\Delta+1)+1)\Delta} \rightarrow \mathbb{R}^{d_{l+1}(\Delta+1)}$  ( $2 \leq l \leq L-1$ ) be

$$\begin{aligned} f^{(l)}(z_v^{(l)}, z_{p_{\text{tail}}(v,1)}^{(l)}, p_n(v,1), z_{p_{\text{tail}}(v,2)}^{(l)}, p_n(v,2), \dots, z_{p_{\text{tail}}(v,\Delta)}^{(l)}, p_n(v,\Delta)) = \\ \text{CONCAT}(g_1^{(l)}(\pi_{p_n(v,1)}^{(l)}(z_{p_{\text{tail}}(v,1)}^{(l)}), \pi_{p_n(v,2)}^{(l)}(z_{p_{\text{tail}}(v,2)}^{(l)}), \dots, \pi_{p_n(v,\Delta)}^{(l)}(z_{p_{\text{tail}}(v,\Delta)}^{(l)}), \pi_{\Delta+1}^{(l)}(z_v^{(l)})), \end{aligned}$$

$$\begin{aligned}
& g_2^{(l)}(\pi_{p_n(v,1)}^{(l)}(z_{p_{\text{tail}}(v,1)}^{(l)}), \pi_{p_n(v,2)}^{(l)}(z_{p_{\text{tail}}(v,2)}^{(l)}), \dots, \pi_{p_n(v,\Delta)}^{(l)}(z_{p_{\text{tail}}(v,\Delta)}^{(l)}), \pi_{\Delta+1}^{(l)}(z_v^{(l)})), \\
& \dots, \\
& g_{\Delta}^{(l)}(\pi_{p_n(v,1)}^{(l)}(z_{p_{\text{tail}}(v,1)}^{(l)}), \pi_{p_n(v,2)}^{(l)}(z_{p_{\text{tail}}(v,2)}^{(l)}), \dots, \pi_{p_n(v,\Delta)}^{(l)}(z_{p_{\text{tail}}(v,\Delta)}^{(l)}), \pi_{\Delta+1}^{(l)}(z_v^{(l)})), \\
& g^{(l)}(\pi_{p_n(v,1)}^{(l)}(z_{p_{\text{tail}}(v,1)}^{(l)}), \pi_{p_n(v,2)}^{(l)}(z_{p_{\text{tail}}(v,2)}^{(l)}), \dots, \pi_{p_n(v,\Delta)}^{(l)}(z_{p_{\text{tail}}(v,\Delta)}^{(l)}), \pi_{\Delta+1}^{(l)}(z_v^{(l)}))),
\end{aligned}$$

where  $\pi_i^{(l)}(h): d_l(\Delta+1) \rightarrow d_l$  selects the  $i$ -th component from  $h$  ( $2 \leq l \leq L$ ,  $1 \leq i \leq \Delta+1$ ), namely,  $\pi_i^{(l)}(h)_j = z_{d_l i+j}$  ( $1 \leq j \leq d_l$ ). Finally, let  $f^{(L)}: \mathbb{R}^{d_L(\Delta+1)+(d_L(\Delta+1)+1)\Delta} \rightarrow Y$  be

$$\begin{aligned}
& f^{(L)}(z_v^{(L)}, z_{p_{\text{tail}}(v,1)}^{(L)}, p_n(v,1), z_{p_{\text{tail}}(v,2)}^{(L)}, p_n(v,2), \dots, z_{p_{\text{tail}}(v,\Delta)}^{(L)}, p_n(v,\Delta)) = \\
& g^{(L)}(\pi_{p_n(v,1)}^{(L)}(z_{p_{\text{tail}}(v,1)}^{(L)}), \pi_{p_n(v,2)}^{(L)}(z_{p_{\text{tail}}(v,2)}^{(L)}), \dots, \pi_{p_n(v,\Delta)}^{(L)}(z_{p_{\text{tail}}(v,\Delta)}^{(L)}), \pi_{\Delta+1}^{(L)}(z_v^{(L)}))
\end{aligned}$$

Intuitively, the embedding of the node  $v$  in the  $l$ -th layer is the concatenation of all the messages that  $v$  sends and the internal state of  $v$  in the  $l$ -th communication round of  $A$ . We now prove that  $\pi_{p_n(v,i)}^{(l)}(z_{p_{\text{tail}}(v,i)}^{(l)}) = \mathbf{m}_{vi}^{(l)}$  and  $\pi_{\Delta+1}^{(l)}(z_v^{(l)}) = \mathbf{s}_v^{(l)}$  ( $2 \leq l \leq L$ ) hold by induction. First,  $z_v^{(1)} = \mathbf{s}_v^{(1)}$  and  $g_{p_n(v,i)}^{(0)}(z_{p_{\text{tail}}(v,i)}^{(1)}) = \mathbf{m}_{vi}^{(1)}$  hold by definition. Therefore,

$$\begin{aligned}
& \pi_{p_n(v,i)}^{(2)}(z_{p_{\text{tail}}(v,i)}^{(2)}) \\
& = g_{p_n(v,i)}^{(1)}(g_{p_n(p_{\text{tail}}(v,i),1)}^{(0)}(z_{p_{\text{tail}}(p_{\text{tail}}(v,i),1)}^{(1)}), \dots, g_{p_n(p_{\text{tail}}(v,i),\Delta)}^{(0)}(z_{p_{\text{tail}}(p_{\text{tail}}(v,i),\Delta)}^{(1)}), z_{p_{\text{tail}}(v,i)}^{(1)})) \\
& = g_{p_n(v,i)}^{(1)}(\mathbf{m}_{p_{\text{tail}}(v,i)1}^{(1)}, \mathbf{m}_{p_{\text{tail}}(v,i)2}^{(1)}, \dots, \mathbf{m}_{p_{\text{tail}}(v,i)\Delta}^{(1)}, z_{p_{\text{tail}}(v,i)}^{(1)}) \\
& = \mathbf{m}_{vi}^{(2)}
\end{aligned}$$

and

$$\begin{aligned}
& \pi_{\Delta+1}^{(2)}(z_v^{(2)}) \\
& = g^{(1)}(g_{p_n(v,1)}^{(0)}(z_{p_{\text{tail}}(v,1)}^{(1)}), g_{p_n(v,2)}^{(0)}(z_{p_{\text{tail}}(v,2)}^{(1)}), \dots, g_{p_n(v,\Delta)}^{(0)}(z_{p_{\text{tail}}(v,\Delta)}^{(1)}), z_v^{(1)}) \\
& = g^{(1)}(\mathbf{m}_{v1}^{(1)}, \mathbf{m}_{v2}^{(1)}, \dots, \mathbf{m}_{v\Delta}^{(1)}, \mathbf{s}_v^{(1)}) \\
& = \mathbf{s}_v^{(2)}
\end{aligned}$$

In the induction step, let  $\pi_{p_n(v,i)}^{(k)}(z_{p_{\text{tail}}(v,i)}^{(k)}) = \mathbf{m}_{vi}^{(k)}$  and  $\pi_{\Delta+1}^{(k)}(z_v^{(k)}) = \mathbf{s}_v^{(k)}$  hold. Then,

$$\begin{aligned}
& \pi_{p_n(v,i)}^{(k+1)}(z_{p_{\text{tail}}(v,i)}^{(k+1)}) \\
& = g_{p_n(v,i)}^{(k)}(\pi_{p_n(p_{\text{tail}}(v,i),1)}^{(k)}(z_{p_{\text{tail}}(p_{\text{tail}}(v,i),1)}^{(k)}), \dots, \pi_{p_n(p_{\text{tail}}(v,i),\Delta)}^{(k)}(z_{p_{\text{tail}}(p_{\text{tail}}(v,i),\Delta)}^{(k)}), \pi_{\Delta+1}^{(k)}(z_{p_{\text{tail}}(v,i)}^{(k)})) \\
& = g_{p_n(v,i)}^{(k)}(\mathbf{m}_{p_{\text{tail}}(v,i)1}^{(k)}, \mathbf{m}_{p_{\text{tail}}(v,i)2}^{(k)}, \dots, \mathbf{m}_{p_{\text{tail}}(v,i)\Delta}^{(k)}, \mathbf{s}_{p_{\text{tail}}(v,i)}^{(k)}) \\
& = \mathbf{m}_{vi}^{(k+1)}
\end{aligned}$$

and

$$\begin{aligned}
& \pi_{\Delta+1}^{(k+1)}(z_v^{(k+1)}) \\
& = g^{(k)}(\pi_{p_n(v,1)}^{(k)}(z_{p_{\text{tail}}(v,1)}^{(k)}), \pi_{p_n(v,2)}^{(k)}(z_{p_{\text{tail}}(v,2)}^{(k)}), \dots, \pi_{p_n(v,\Delta)}^{(k)}(z_{p_{\text{tail}}(v,\Delta)}^{(k)}), \pi_{\Delta+1}^{(k)}(z_v^{(k)})) \\
& = g^{(k)}(\mathbf{m}_{v1}^{(k)}, \mathbf{m}_{v2}^{(k)}, \dots, \mathbf{m}_{v\Delta}^{(k)}, \mathbf{s}_v^{(k)}) \\
& = \mathbf{s}_v^{(k+1)}
\end{aligned}$$

By induction,  $\pi_{p_n(v,i)}^{(l)}(z_{p_{\text{tail}}(v,i)}^{(l)}) = \mathbf{m}_{vi}^{(l)}$  and  $\pi_{\Delta+1}^{(l)}(z_v^{(l)}) = \mathbf{s}_v^{(l)}$  ( $2 \leq l \leq L$ ) hold. Therefore, the final output of this VV<sub>C</sub>-GNN is the same as that of  $A$ .  $\square$

**Lemma 14** ([10]). *Let  $\mathcal{P}_{SB(1)}$ ,  $\mathcal{P}_{MB(1)}$ , and  $\mathcal{P}_{VV_C(1)}$  be the set of graph problems that distributed local algorithms on  $SB(1)$ ,  $MB(1)$ , and  $VV_C(1)$  models can solve only with the degree features, respectively. Then,  $\mathcal{P}_{SB(1)} \subsetneq \mathcal{P}_{MB(1)} \subsetneq \mathcal{P}_{VV_C(1)}$ .*

*Proof of Theorem 2.* From Theorem 1 and Lemma 14,  $\mathcal{P}_{\text{SB}(1)} = \mathcal{P}_{\text{SB-GNNs}} \subsetneq \mathcal{P}_{\text{MB}(1)} = \mathcal{P}_{\text{MB-GNNs}} \subsetneq \mathcal{P}_{\text{VVC}(1)} = \mathcal{P}_{\text{VVC-GNNs}}$  holds.  $\square$

**Lemma 15** ([1, 24]). *Let  $A$  be any distributed local algorithm with  $L$  communication rounds,  $G = (V, E)$  and  $G' = (V', E')$  be any graphs,  $p$  and  $p'$  be any port numberings of  $G$  and  $G'$ ,  $\mathbf{X}$  and  $\mathbf{X}'$  be any input to the nodes  $V$  and  $V'$ , and  $v$  and  $v'$  be any nodes of  $G$  and  $G'$ , respectively. If the radius- $L$  local views of  $v$  and  $v'$  are the same, the outputs of  $A$  for  $v$  and  $v'$  are the same.*

*Proof of Theorem 3.*  $\mathcal{P}_{\text{CPNGNNs}} \subseteq \mathcal{P}_{\text{VVC-GNNs}}$  clearly holds because any CPNGNN is a VVC-GNN. Now, we prove  $\mathcal{P}_{\text{CPNGNNs}} \supseteq \mathcal{P}_{\text{VVC-GNNs}}$ . We decompose CPNGNNs into two parts. The first part  $\Phi_\theta$  corresponds to lines 3-8 of in Algorithm 2 (i.e., communication round) and the second part  $\Psi_{\theta'}$  corresponds to the tenth line of Algorithm 2 (i.e., calculating the final embedding). Namely,  $\Phi_\theta(G, \mathbf{X}, v) = \mathbf{z}_v^{(L+1)}$  and  $\Psi_{\theta'}(\mathbf{z}_v^{(L+1)}) = \mathbf{z}_v$ , where  $\theta$  and  $\theta'$  are parameters of the network (i.e.,  $\mathbf{W}^{(l)}$  ( $l = 1, 2, \dots, L$ ) and the parameters of MLP).

Let  $\mathbf{W}^{(1)}, \mathbf{W}^{(2)}, \dots, \mathbf{W}^{(L)}$  be the identity matrices. Let  $G = (V, E)$  and  $G' = (V, E)$  be any graphs,  $p$  and  $p'$  be any port numberings of  $G$  and  $G'$ ,  $\mathbf{X}$  and  $\mathbf{X}'$  be input vectors whose elements are non-negative integers, and  $v$  and  $v'$  be any nodes of  $G$  and  $G'$ , respectively.

**Lemma 16.** *If the radius- $L$  local views of  $v$  and  $v'$  are the same,  $\Phi_\theta(G, \mathbf{X}, v) = \Phi_\theta(G', \mathbf{X}', v')$ .*

*Proof of Lemma 16.* We prove that for any  $v \in V$ , we can reconstruct the radius- $l$  local view of  $v$  from  $\mathbf{z}_v^{(l+1)}$  using mathematical induction. When  $l = 1$ ,  $\mathbf{z}_v^{(2)} = \text{CONCAT}(\mathbf{z}_v^{(1)}, \mathbf{z}_{p_{\text{tail}}(v,1)}^{(1)}, p_n(v,1), \mathbf{z}_{p_{\text{tail}}(v,2)}^{(1)}, p_n(v,2), \dots, \mathbf{z}_{p_{\text{tail}}(v,\Delta)}^{(1)}, p_n(v,\Delta))$ . We omit the ReLU function because the vector is always non-negative. The input vector of node  $v$  is  $\mathbf{z}_v^{(1)}$ . The input vector of the node that sends the message to the  $i$ -th port of node  $v$  is  $\mathbf{z}_{p_{\text{tail}}(v,i)}^{(1)}$ , and its port number that sends to the node  $v$  is  $p_n(v,i)$ . Therefore,  $\mathbf{z}_v^{(2)}$  includes sufficient information on the input vector of node  $v$ , input vectors of neighboring nodes, and port numbering of the incident edges. In the induction step, for any  $v \in V$ ,  $\mathbf{z}_v^{(k+1)}$  contains sufficient information to reconstruct the radius- $k$  local view of  $v$ . When  $l = k + 1$ ,  $\mathbf{z}_v^{(k+2)} = \text{CONCAT}(\mathbf{z}_v^{(k+1)}, \mathbf{z}_{p_{\text{tail}}(v,1)}^{(k+1)}, p_n(v,1), \mathbf{z}_{p_{\text{tail}}(v,2)}^{(k+1)}, p_n(v,2), \dots, \mathbf{z}_{p_{\text{tail}}(v,\Delta)}^{(k+1)}, p_n(v,\Delta))$ . From the inductive hypothesis, we can reconstruct the radius- $k$  local view  $\mathcal{T}_v$  of node  $v$ . For any  $i$ , we can reconstruct the radius- $k$  local view  $\mathcal{T}_i$  of the node that sends a message to the  $i$ -th port of the node  $v$ . We call this node  $u_i$  for the purpose of explanation. Note that we cannot identify which node  $u$  is. We merge all of  $\mathcal{T}_i$  with  $\mathcal{T}_v$  to construct the radius- $(k + 1)$  local view of node  $v$ . There exists at least one child of the root of  $\mathcal{T}_i$  that is compatible when we merge  $\mathcal{T}_i$  and  $\mathcal{T}_v$  because  $v$  is an adjacent node of  $u_i$ . In other words, there exists a child  $c$  of the root of  $\mathcal{T}_i$  such that the port numbering between  $c$  and  $u$  is the same as that between  $v$  and  $u$  and the subtree of  $\mathcal{T}_i$  where the root is  $c$  is the same as the radius- $(k - 1)$  local view of  $v$  without the subtree where the root is  $v$ . The node  $c$  corresponds to node  $v$ . Note that  $c$  may not be  $v$  itself, but this is irrelevant because the resulting tree is isomorphic. After we merge all  $\mathcal{T}_i$ , the resulting tree is the radius- $(k + 1)$  local view of  $v$ . By mathematical induction, for any  $v \in V$ , we can reconstruct the radius- $l$  local view of  $v$  from  $\mathbf{z}_v^{(l+1)}$ . Therefore, if the radius- $L$  local views of  $v$  and  $v'$  are the same, the outputs  $\mathbf{z}_v^{(L+1)}$  and  $\mathbf{z}_{v'}^{(L+1)}$  must be the same.  $\square$

Furthermore, if the input vectors  $\mathbf{X}$  are bounded non-negative integers (i.e.,  $\mathbf{X} \in (\mathbb{N} \cap [0, \alpha])^{n \times d_1}$  for some  $\alpha \in \mathbb{N}$ ), the output vector  $\Phi_\theta(G, \mathbf{X}, v)$  consists of bounded non-negative integers (i.e.,  $\Phi_\theta(G, \mathbf{X}, v) \in (\mathbb{N} \cap [0, \beta])^{d_{L+1}}$  for some  $\beta \in \mathbb{N}$ ). Let  $N$  be any VVC-GNN. From Lemmas 12, there exists a distributed local algorithm  $A$  that solves the same set of graph problems as  $N$ . Let  $f(G, \mathbf{X}, v) \in \{0, 1\}^{|Y|}$  represent the one-hot vector of the output of  $A$ . From Lemma 15 and 16, there exists a function  $h(\mathbf{v}): (\mathbb{N} \cap [0, \beta])^{d_{L+1}} \rightarrow \{0, 1\}^{|Y|}$  such that  $h \circ \Phi_\theta(G, \mathbf{X}, v) = f(G, \mathbf{X}, v)$ . Let  $h': [0, \beta]^{d_{L+1}} \rightarrow [0, 1]^{|Y|}$  be a linear interpolation of  $h$ . Because  $h'$  is continuous and bounded, from the universal approximation theorem [5], there exists a parameter  $\theta'$  such that for any  $\mathbf{v} \in [0, \beta]^{d_{L+1}}$ ,  $\|\Psi_{\theta'}(\mathbf{v}) - h'(\mathbf{v})\|_2 < 1/3$ . Therefore, the maximum index of  $\Psi_{\theta'}(\mathbf{z}_v^{(L+1)})$  is the same as that of  $h(\mathbf{z}_v^{(L+1)})$  and the output of this network is the same as that of  $N$  for any input.  $\square$

---

**Algorithm 3** Calculating a consistent port numbering

---

**Require:** Graph  $G = (V, E)$ .

**Ensure:** Consistent port numbering  $p$ .

```
1:  $c_v \leftarrow 0 \forall v \in V$ 
2:  $p \leftarrow$  empty dictionary
3: for  $\{u, v\} \in E$  do
4:    $c_u \leftarrow c_u + 1$ 
5:    $c_v \leftarrow c_v + 1$ 
6:    $p((u, c[u])) = (v, c[v])$ 
7:    $p((v, c[v])) = (u, c[u])$ 
8: end for
9: return  $p$ 
```

---

**Lemma 17** ([3, 6, 15]). *The optimal approximation ratio of the  $VV_C$  model for the minimum dominating set problem is  $\Delta + 1$ .*

**Lemma 18** ([3]). *If inputs contain weak 2-coloring, the optimal approximation ratio of the  $VV_C$  model for the minimum dominating set problem is  $\frac{\Delta+1}{2}$ .*

**Lemma 19** ([3]). *If inputs contain 2-coloring, the optimal approximation ratio of the  $VV_C$  model for the minimum dominating set problem is  $\frac{\Delta+1}{2}$ .*

**Lemma 20** ([2, 6, 15]). *The optimal approximation ratio of the  $VV_C$  model for the minimum vertex cover problem is 2.*

**Lemma 21** ([3, 6]). *The optimal approximation ratio of the  $VV_C$  model for the maximum matching problem does not exist.*

**Lemma 22** ([3]). *If inputs contain weak 2-coloring, the optimal approximation ratio of the  $VV_C$  model for the maximum matching problem is  $\frac{\Delta+1}{2}$ .*

**Lemma 23** ([3]). *For any  $\Delta \geq 1$  and  $\varepsilon > 0$ , there is a distributed local algorithm on the  $VV_C$  model with approximation ratio factor  $1 + \varepsilon$  for maximum matching in 2-colored graphs.*

Theorems 4, 5, 6, 7, 8, 9, and 10 immediately follow from Lemmas 17, 18, 19, 20, 21, 22, and 23, respectively, because from Theorems 1 and 3, the set of graph problems that CPNGNNs can solve is the same as that that the  $VV_C$  model can.

## B How to Calculate a Consistent Port Numbering and a Weak 2-Coloring

A consistent port numbering can be calculated in linear time. We show the pseudo code in Algorithm 3. A weak 2-coloring can be also calculated in linear time by breadth first search. We show the pseudo code in Algorithm 4. Note that if the input graph is bipartite, Algorithm 4 returns a 2-coloring of the input graph.

## C Experiments

In this section, we confirm that CPNGNNs can solve a graph problem that existing GNNs cannot through experiments. We use a toy task named finding single leaf [10]. In this problem, the input is a star graph, and the output must be a single leaf of the graph. If the input graph is not a star graph, GNNs may output any subset of nodes. Formally, this graph problem is expressed as follows:

$$\Pi(G) = \begin{cases} \{\{v\} \mid v \in V, \deg(v) = 1\} & \text{if } G \text{ is a star graph} \\ 2^V \text{ (i.e., any subset of } V) & \text{otherwise} \end{cases}.$$

No MB-GNN can solve this problem because for any layer, the latent vector in each leaf node is identical and MB-GNNs must output the same decision for all leaf nodes.

In this experiment, we use a star graph with four nodes: one center node and three leaves used for both training and testing. We use a two-layer CPNGNN that learns the stochastic policy of node

---

**Algorithm 4** Calculating a weak 2-coloring

---

**Require:** Graph  $G = (V, E)$ .

**Ensure:** Weak 2-coloring  $c$ .

```
1:  $f_v \leftarrow \text{false} \forall v \in V$ 
2:  $q \leftarrow$  empty queue
3:  $v_0 \leftarrow$  an arbitrary node in  $G$ 
4:  $q.\text{push}((v_0, 0))$ 
5:  $f_{v_0} \leftarrow \text{true}$ 
6: while  $q$  is not empty do
7:    $(v, x) \leftarrow q.\text{front}()$ 
8:    $q.\text{pop}()$ 
9:    $c(v) = x$ 
10:  for  $u \in \mathcal{N}(v)$  do
11:    if not  $f_u$  then
12:       $q.\text{push}((u, 1 - x))$ 
13:       $f_u \leftarrow \text{true}$ 
14:    end if
15:  end for
16: end while
17: return  $c$ 
```

---

selection and train the model using the REINFORCE algorithm [29]. If the output selects only one leaf, the reward is 1, and otherwise, the reward is  $-1$ . We ran 10 trials with different seeds. After 10000 iterations of training, the model solves the finding single leaf problem in all trials. However, we train GCN [12], GraphSAGE [9], and GAT [26] to solve this task, but none of them could solve the finding single leaf problem, as our theory shows. This indicates that the existing GNNs cannot solve such a simple combinatorial problem whereas our proposed model can.
